# Supplementary material
Source: bioRxiv or medRxiv preprint supplement (https://medrxiv.org/highwire/filestream/95679/field_highwire_adjunct_files/1/2020.09.04.20187989-2.pdf)
Supplement: Supplementary file [file 2020.09.04.20187989-2.pdf]

**Supporting Table 1. Ratings on a 20-Item case report form by clinical experts.**

| Item                                                                       | Expert 1 | Expert 2 | Expert 3 | Expert 4 | Expert 5 | Expert 6 | Number in agreement           | Item CVI |
|----------------------------------------------------------------------------|----------|----------|----------|----------|----------|----------|-------------------------------|----------|
| <b>Patient characteristics</b>                                             |          |          |          |          |          |          |                               |          |
| Age                                                                        | x        | x        | x        | x        | x        | x        | 6                             | 1.0      |
| Gender                                                                     | x        | x        | x        |          | x        |          | 4                             | 0.57     |
| Cognitive impairment                                                       | x        | x        | x        | x        | x        | x        | 6                             | 1.0      |
| Patient knowledges related to PIVC                                         | x        | x        | x        | x        | x        | x        | 6                             | 1.0      |
| <b>catheter adequacy and insertion</b>                                     |          |          |          |          |          |          |                               |          |
| Vascular access device type                                                | x        | x        | x        | x        | x        | x        | 6                             | 1.0      |
| Insertion site                                                             | x        | x        | x        | x        | x        | x        | 6                             | 1.0      |
| Intravenous cannula size                                                   | x        | x        | x        | x        | x        | x        | 6                             | 1.0      |
| Indwelling time                                                            | x        | x        | x        | x        | x        | x        | 6                             | 1.0      |
| Setting of Insertion                                                       | x        | x        | x        | x        | x        | x        | 6                             | 1.0      |
| <b>Catheter and catheter site care</b>                                     |          |          |          |          |          |          |                               |          |
| Inspection of insertion site                                               | x        | x        | x        | x        | x        | x        | 6                             | 1.0      |
| Securement                                                                 | x        | x        | x        | x        | x        | x        | 6                             | 1.0      |
| Dressing type                                                              | x        | x        | x        | x        | x        | x        | 6                             | 1.0      |
| Dressing status                                                            | x        | x        | x        | x        | x        | x        | 6                             | 1.0      |
| add-on devices or connectors                                               | x        | x        | x        | x        | x        | x        | 6                             | 1.0      |
| Infusion type                                                              | x        | x        | x        | x        | x        | x        | 6                             | 1.0      |
| <b>Catheter removal and replacement strategies</b>                         |          |          |          |          |          |          |                               |          |
| Visualization of adverse event                                             | x        | x        | x        | x        | x        | x        | 6                             | 1.0      |
| PIVC failure                                                               | x        | x        | x        | x        | x        | x        | 6                             | 1.0      |
| Unnecessary PIVC                                                           | x        | x        | x        | x        | x        | x        | 6                             | 1.0      |
| <b>Record and documentation PIVC care</b>                                  |          |          |          |          |          |          |                               |          |
| PIVC insertion records                                                     | x        | x        | x        | x        | x        | x        | 6                             | 1.0      |
| Dressing date recorded                                                     | x        | x        | x        |          | x        | x        | 5                             | 0.83     |
| <b>Proportion relevant</b>                                                 | 1.0      | 1.0      | 1.0      | 0.9      | 1.0      | 0.95     | <b>Mean I-CVI</b>             | 0.97     |
|                                                                            |          |          |          |          |          |          | <b>S-CVI/UA</b>               | 0.90     |
|                                                                            |          |          |          |          |          |          | <b>Mean expert proportion</b> | 0.98     |
| <b>Table 2. Ratings on a 25-Item case report form by clinical experts.</b> |          |          |          |          |          |          |                               |          |

I-CVI, item-level content validity index.

S-CVI/UA, scale-level content validity index, universal agreement calculation method.
